## RESEARCH ARTICLE

# Soil applied potassium improves productivity and fiber quality of cotton cultivars grown on potassium deficient soils

Shabir Hussain<sup>☉</sup>, Hakoomat Ali<sup>✉</sup>, Syed Tahir Raza Gardezi<sup>☉</sup>

Department of Agronomy, Faculty of Agricultural Sciences and Technology, Bahauddin Zakariya University, Multan, Pakistan

<sup>☉</sup> These authors contributed equally to this work.\* [hha94@bzu.edu.pk](mailto:hha94@bzu.edu.pk)

## Abstract

Cotton (*Gossypium hirsutum* L.) is considered as the most valuable cash crop of Pakistan. During last decade, its yield has been declined due to various biotic and abiotic factors. Among abiotic factors, improper use of fertilizers is considered very important specially regarding plant defense and yield. This study was conducted to evaluate the effect of different levels (0, 40, 80 and 120 kg ha<sup>-1</sup>) of K fertilizer (K<sub>2</sub>O) on different growth parameters of two commercial Bt cotton cultivars (CYTO-301 and IUB-2013) and one non-Bt cultivar (CYTO-142) during 2016 and 2017. Maximum plant height (124–134 cm), dry matter contents (915–1005%), fruiting point (441–462), bolls per plant (96–139), average boll weight (4.2–5.2 g) and seed cotton yield (2524–3175 kg ha<sup>-1</sup>) and minimum shedding (43–73%) were observed in plots receiving highest dose of K (120 kg ha<sup>-1</sup>). The CYTO-103 cultivar was found more responsive to K fertilizer as compared to rest of cultivars (CYTO-142 and IUB-2013). Concluding, ideal dose of fertilizer is very important (120 kg ha<sup>-1</sup> in our case) for optimum growth and production of good quality fiber with enhanced seed cotton yield.

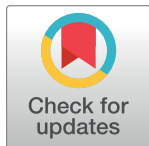

## OPEN ACCESS

**Citation:** Hussain S, Ali H, Gardezi STR (2021) Soil applied potassium improves productivity and fiber quality of cotton cultivars grown on potassium deficient soils. PLoS ONE 16(4): e0250713. <https://doi.org/10.1371/journal.pone.0250713>

**Editor:** Shahid Farooq, Harran Üniversitesi, TURKEY

**Received:** January 12, 2021

**Accepted:** April 13, 2021

**Published:** April 29, 2021

**Copyright:** © 2021 Hussain et al. This is an open access article distributed under the terms of the [Creative Commons Attribution License](https://creativecommons.org/licenses/by/4.0/), which permits unrestricted use, distribution, and reproduction in any medium, provided the original author and source are credited.

**Data Availability Statement:** All data are provided within the manuscript.

**Funding:** The authors received no specific funding for this work.

**Competing interests:** The authors have declared that no competing interests exist

## Introduction

Cotton (*Gossypium hirsutum* L.) is commonly termed as “White Gold” owing to its quality fiber and its adaptability to various ecological zones across the world [1]. It is cultivated mainly for its fiber and low cholesterol oil. It also plays a key role in the economic and social affairs of the world providing basic inputs to the textile industry [2, 3]. It is considered as the backbone of Pakistan’s economy. Area under cultivation of cotton is around 2.373 million hectares with annual production of 9.861 million bales. It has major share in gross domestic product (0.8%) and agriculture value addition (4.5%) [4]. Pakistan is among the top leading cotton producing countries of the world [5].

During last decade, per unit area yield of cotton is decreasing due to various biotic and abiotic factors. Among various abiotic stressors, imbalance use of fertilizers has received great attention of researchers [6, 7]. Optimum use of fertilizers in any crop is crucial for obtaining better crop yields and economic returns (Pettigrew *et al.* 2005). Nutrition application is considered one of the major factors for increasing yield on a per hectare basis [8].

Along with other macro elements, well-balanced potassium nutrition is important for producing a high quality, high-yielding cotton crop [9]. Among synthetic fertilizers, the use of potassium (K) fertilizers is quite low in cotton, especially in Pakistan [10]. Severe K deficiency in cotton can decrease yield and reduce fiber quality by decreasing the expansion of leaf area and CO<sub>2</sub> assimilation capacity [11, 12]. Fast-growing and early maturing cultivars are more sensitive to K-deficiency [13]. Indirect indicators of K-deficiency may include early wilting, variable yields, early senescence and poor quality [14].

The soil application of macronutrients (including K) is the most common way of improving soil fertility [15]. However, high doses of fertilizers are needed for soil application [16]. Macronutrients (particularly K) can fix within the soil depending upon the charge of clay minerals; thus, reducing their availability to the crops [17].

Utilization of mineral fertilizers is sought as an effective strategy to improve soil nutrient and boost cotton yield [18]. Though the role of K is well established in the cotton [19], but a study on appropriate dose of K in combination with the commercial available and genetically different cultivars was lacking according to ecological conditions of Pakistan. Keeping in view the above mentioned facts, the present study was conducted to evaluate the response of different cotton cultivars under different K levels and their effect on productivity, seed-cotton yield and fiber quality grown under the agro-ecological conditions of Multan, Pakistan.

## Materials and methods

### Experimental particulars

A two years (2016–2017) field study was conducted to evaluate the influence of different levels of K (K) fertilizer on growth, productivity and fiber quality of cotton cultivars at the Research farm of Central Cotton Research Institute, Multan, Pakistan. Before sowing of the crop, soil samples were collected from experimental field to a depth of 30 cm and soil was found K deficient. All other physical and chemical parameters of soil, collected from experimental field are shown in Table 1. For experiment, two Bt cotton cultivars (CYTO-301 and IUB-2013) and one non-Bt cultivar (CYTO-142) were used. The CYTO-301 and CYTO-142 were developed by Central Cotton Research Institute, Multan and IUB-2013 was developed by the Islamia University, Bahawalpur, Pakistan. The three cultivars were sown in the main plots while four fertilizer doses (0, 40, 80 and 120 kg ha<sup>-1</sup> of K<sub>2</sub>O) were applied to the sub plots. A randomized complete block design (RCBD) with split plot arrangement with three replications was selected for the study.

**Table 1. Physico-chemical analysis of experimental soil (on dry weight basis).**

| Parameters                            | 2016  | 2017  |
|---------------------------------------|-------|-------|
| <b>A. Mechanical Analysis of Soil</b> |       |       |
| Sand (%)                              | 19    | 22    |
| Silt (%)                              | 41    | 40    |
| Clay (%)                              | 40    | 38    |
| <b>B. Chemical Analysis of Soil</b>   |       |       |
| EC (d Sm <sup>-1</sup> )              | 1.79  | 1.81  |
| pH                                    | 8.01  | 8.02  |
| Organic matter (%)                    | 0.66  | 0.63  |
| Total nitrogen (%)                    | 0.041 | 0.040 |
| Available P (ppm)                     | 5.52  | 5.58  |
| Available K (ppm)                     | 99    | 98    |

<https://doi.org/10.1371/journal.pone.0250713.t001>

## Crop husbandry

Seedbed was prepared by three cultivations of a tractor mounted cultivator followed by planking. The sowing was done manually with single row cotton drill in 75 cm apart rows where seed rate was 20 kg ha<sup>-1</sup>. In order to adjust recommended plant population, thinning was done after 28 days of sowing by pulling out the extra plants manually. Plant-to-plant distance was adjusted up to 25 cm. Seeds were delinted with concentrated H<sub>2</sub>SO<sub>4</sub> before sowing. The recommended doses of nitrogen and phosphorus fertilizers i.e. 250 kg ha<sup>-1</sup> and 100 kg ha<sup>-1</sup> were used as per standard practices. Weed control and recommended plant protection measures were followed for the control of sucking pests and bollworms. The calculated amount of irrigation water was applied to each experimental unit at regular intervals depending upon the climatic conditions. The experimental crop was harvested in the 2nd week of November during 2016 and 2017. Except the experimental treatments, all other agronomic practices like irrigation, weeding, and insect pest control were applied uniformly in all experimental units.

## Growth and yield parameters

At maturity, the height of five randomly selected plants from each replication was measured from the base of the plant to the tip of the main stem with measuring tape. Similarly, five plants were chosen randomly after harvesting for estimation of plant dry matter. The selected plants were sun dried and then weighed individually. Twenty plants were chosen randomly and tagged in every plot and total fruiting points were counted manually. Finally means were computed for each replication. Shedding points were also recorded randomly selected 20 plants and shedding percentage was assessed from each experimental unit followed by computing means. Mature and effective bolls were picked and counted from the randomly selected plants at maturity and were averaged to calculate the number of bolls per plant. For the average boll weight (g) data 20 effective and opened bolls were selected at random from each treatment. They were separated from plants and were weighed along with locules. The average boll weight was computed and expressed in grams (g). The seed cotton yield per hectare was calculated by using the seed cotton yield obtained from net plot area and seed cotton weight of already separated 20 bolls was added in it. Seed cotton yield of each plot was converted to kg ha<sup>-1</sup>.

## Quality parameters

Staple length, a primary determinant of cotton quality, was measured according to the method of Krifa [20]. To determine the fiber elongation percentage, a method proposed by Hunt (1978) was followed. Fiber quality traits i.e. fiber strength and fiber maturity ratio were studied by putting a 20 (g) sample of lint in a latest computerized high Volume Instrument (HVI) USTER-900A in fiber testing laboratory, Fiber Technology Department, University of Agriculture Faisalabad. Fiber strength is the tensile strength of fiber which is measured in g/tex.

## Statistical analysis

The data collected were analyzed statistically by using Fisher's analysis of variance technique. Data was normally distributed in most of the cases. While, in case of percentages data were subjected to arcsine transformation before the ANOVA. Difference among treatments' means was compared using least significant difference test at 5% probability level [21].

## Results

Data of plant height showed significant differences among the tested cultivars and rates of K (K) during both years 2016 & 2017 (Table 2). Among cultivars of cotton, CYTO-301 produced

**Table 2. Impact of different levels of soil applied K<sub>2</sub>O on plant height and total plant dry matter of cotton cultivars grown under K deficient soil.**

| Parameters              | Plant Height (cm) |          |          |          |          |          |          |          | Total Plant Dry Matter |          |          |          |          |          |          |          |
|-------------------------|-------------------|----------|----------|----------|----------|----------|----------|----------|------------------------|----------|----------|----------|----------|----------|----------|----------|
|                         | 2016              |          |          |          | 2017     |          |          |          | 2016                   |          |          |          | 2017     |          |          |          |
|                         | CYTO-301          | CYTO-142 | IUB-2013 | Mean (T) | CYTO-301 | CYTO-142 | IUB-2013 | Mean (T) | CYTO-301               | CYTO-142 | IUB-2013 | Mean (T) | CYTO-301 | CYTO-142 | IUB-2013 | Mean (T) |
| 0 kg K <sub>2</sub> O   | 110.00            | 103.25   | 100.25   | 104.50 D | 108.75   | 104.00   | 100.25   | 104.33 D | 973 de                 | 953 f    | 941 g    | 956 C    | 852 g    | 814 i    | 781 j    | 816 D    |
| 40 kg K <sub>2</sub> O  | 118.50            | 114.00   | 106.75   | 113.08 C | 116.75   | 113.50   | 109.25   | 113.17 C | 980 cd                 | 974 de   | 962 e    | 972 B    | 896 e    | 871 f    | 836 h    | 862 C    |
| 80 kg K <sub>2</sub> O  | 128.75            | 123.50   | 116.50   | 122.92 B | 127.25   | 124.25   | 118.50   | 123.33 B | 995 ab                 | 986 bc   | 976 cd   | 985 AB   | 932 bc   | 911 d    | 884 ef   | 909 B    |
| 120 kg K <sub>2</sub> O | 134.75            | 128.75   | 124.50   | 129.33 A | 134.25   | 128.50   | 124.50   | 129.08 A | 1005 a                 | 990 b    | 985 b-d  | 993 A    | 959 a    | 940 b    | 915 cd   | 938 A    |

C = Cultivars, T = Treatments, NS = Non-significant, Different alphabets with in the same column or row indicate statistically significant differences.

<https://doi.org/10.1371/journal.pone.0250713.t002>

significantly longer plants i.e. 134.75 cm at the highest K level than CYTO-142 and IUB-2013. Similarly, values for plant dry matter varied significantly in both cultivars and different K levels. Among cultivars, CYTO-301 produced more plant dry matter (959 and 1005) at highest level of K) followed by CYTO-142 and IUB-2013 in both years of experimentation at the highest level of K (120 kg K<sub>2</sub>O). Fruiting points data is shown in Table 3. Fruit points varied significantly among different levels of K application. The CYTO-301 depicted more fruiting points (461 and 453) followed by CYTO-142 and IUB-2013 at the highest K levels (120 kg K<sub>2</sub>O) during both years of study. Shedding percentage (%) also significantly improved by different fertilizer rates of K. In case of cotton cultivars, CYTO-301 showed significantly minimum shedding percentage (38% and 43%) than CYTO-142 and IUB-2013. Regarding fertilizer rates, maximum value of shedding percentage (%) was obtained where K fertilizer was not applied. Interactive effects of cultivars and K levels was also found significant regarding shedding percentage. Minimum shedding percentage (%) was recorded in CYTO-301 by K application at the rate of 120 kg per hectare.

There were significant differences among different treatments i.e. cultivars and different rates of K application regarding number of bolls (Table 4). It is obvious from the result that the boll number was increased by increasing K rate. The highest numbers of bolls (139, 135) were produced in case of CYTO-301 with K fertilizer at the rate of 120 kg per hectare during both the years of experimentation. Similar trend was also found regarding average boll weight (g)

**Table 3. Impact of different levels of soil applied K<sub>2</sub>O on fruiting points and shedding percentage of cotton cultivars grown under K deficient soil.**

| Parameters              | Fruiting Points |          |          |          |          |          |          |          | Shedding percentage (%) |          |          |          |          |          |          |          |
|-------------------------|-----------------|----------|----------|----------|----------|----------|----------|----------|-------------------------|----------|----------|----------|----------|----------|----------|----------|
|                         | 2016            |          |          |          | 2017     |          |          |          | 2016                    |          |          |          | 2017     |          |          |          |
|                         | CYTO-301        | CYTO-142 | IUB-2013 | Mean (T) | CYTO-301 | CYTO-142 | IUB-2013 | Mean (T) | CYTO-301                | CYTO-142 | IUB-2013 | Mean (T) | CYTO-301 | CYTO-142 | IUB-2013 | Mean (T) |
| 0 kg K <sub>2</sub> O   | 415 e           | 411 ef   | 403 f    | 410 D    | 405 ef   | 402 ef   | 391 f    | 399 D    | 60 h                    | 70 d     | 81 a     | 70 A     | 52 gh    | 65 de    | 74 a     | 64 A     |
| 40 kg K <sub>2</sub> O  | 428 d           | 423 de   | 421 de   | 424 C    | 419 d    | 413 de   | 408 e    | 413 C    | 56 i                    | 67 e     | 78 b     | 67 B     | 47 i     | 63 e     | 72 b     | 61 B     |
| 80 kg K <sub>2</sub> O  | 445 b           | 439 c    | 431 cd   | 438 B    | 435 bc   | 430 c    | 423 cd   | 429 B    | 50 j                    | 66 ef    | 77 bc    | 64 C     | 43 j     | 60 f     | 70 c     | 58 C     |
| 120 kg K <sub>2</sub> O | 461 a           | 453 ab   | 449 b    | 454 A    | 453 a    | 447 ab   | 441 b    | 447 A    | 43 k                    | 63 g     | 73 c     | 60 D     | 38 k     | 56 g     | 66 d     | 53 D     |

C = Cultivars, T = Treatments, NS = Non-significant, Different alphabets with in the same column or row indicate statistically significant differences.

<https://doi.org/10.1371/journal.pone.0250713.t003>

**Table 4. Impact of different levels of soil applied K<sub>2</sub>O on number of bolls per plant and boll weight of cotton cultivars grown under K deficient soil.**

| Parameters              | Number of Bolls Plant <sup>-1</sup> |          |          |          |          |          |          |          | Boll Weight (g) |          |          |          |          |          |          |          |
|-------------------------|-------------------------------------|----------|----------|----------|----------|----------|----------|----------|-----------------|----------|----------|----------|----------|----------|----------|----------|
|                         | 2016                                |          |          |          | 2017     |          |          |          | 2016            |          |          |          | 2017     |          |          |          |
|                         | Cultivars                           | CYTO-301 | CYTO-142 | IUB-2013 | Mean (T) | CYTO-301 | CYTO-142 | IUB-2013 | Mean (T)        | CYTO-301 | CYTO-142 | IUB-2013 | Mean (T) | CYTO-301 | CYTO-142 | IUB-2013 |
| 0 kg K <sub>2</sub> O   | 130 cd                              | 120 f    | 97 i     | 116 D    | 117 d    | 101 g    | 78 k     | 99 D     | 2.1 cd          | 1.8 cd   | 1.1 d    | 1.6 D    | 1.3 d    | 1.1 d    | 0.9 d    | 1.1 D    |
| 40 kg K <sub>2</sub> O  | 134 bc                              | 125 e    | 108 h    | 122 C    | 124 c    | 107 f    | 84 j     | 105 C    | 3.1 bc          | 2.8 bc   | 2.6 c    | 2.8 C    | 3.1 bc   | 2.5 c    | 2.1 cd   | 2.6 C    |
| 80 kg K <sub>2</sub> O  | 136 b                               | 128de    | 114 g    | 126 B    | 130 b    | 112 e    | 90 i     | 111 B    | 3.9 b           | 3.8 b    | 3.4 bc   | 3.7 B    | 3.6 b    | 3.4 bc   | 3.2 bc   | 3.4 B    |
| 120 kg K <sub>2</sub> O | 139 a                               | 131 c    | 118 fg   | 129 A    | 135 a    | 122 cd   | 96 h     | 118 A    | 5.2 a           | 4.5 ab   | 4.3 ab   | 4.7 A    | 4.8 a    | 4.5 ab   | 4.2 ab   | 4.5 A    |

C = Cultivars, T = Treatments, NS = Non-significant, Different alphabets with in the same column or row indicate statistically significant differences.

<https://doi.org/10.1371/journal.pone.0250713.t004>

(Table 4). Different treatments i.e. cultivars and rates of K had significant effect on seed cotton yield (Table 5). Highest seed cotton yield of 2908 kg ha<sup>-1</sup> and 2841 kg ha<sup>-1</sup> was recorded in CYTO-301 cultivar. While, the lowest yield of 2379 kg ha<sup>-1</sup> and 2361 kg ha<sup>-1</sup> was produced in case of IUB-2013 during both years of experiments. While all the four different K fertilizer application rates showed statistically significant results. Highest seed cotton yield (2808 kg ha<sup>-1</sup> and 2673 kg ha<sup>-1</sup>) was produced at the highest dose of K in both years. While the lowest seed cotton yield (2467 kg ha<sup>-1</sup> and 2445 kg ha<sup>-1</sup>) was produced when no K was applied during both years.

Highest staple length was produced by cultivar CYTO-301 and the lowest staple length was produced by IUB-2013 cultivar during both the years of experiments (Table 6). The maximum staple length was calculated when highest dose of K was applied which reduced to minimum where K fertilizer was not applied. Similar observations were recorded regarding fiber elongation percentage (Table 6). The results indicated that different cultivars and rates of K fertilizer significantly influenced the fiber strength and fiber maturity ratio (Table 7). The highest fiber strength and maturity ratio were observed in CYTO-301 while the lowest fiber strength and maturity ratio were produced by IUB-2013 cultivar during both the years of experiment. Fiber strength and maturity ratio were produced with 120 kg of K per ha during both the year of experimentation while lowest values were observed where K was not applied.

## Discussion

This experiment was accomplished in semi-arid environment of Multan region to explore the influences of K<sub>2</sub>O fertilizer on performance of cotton cultivars. All the levels of K fertilizer significantly ( $P < 0.05$ ) improved the growth, yield and quality parameters of cotton cultivars.

Doses in this experiment were set according to a preliminary trial and review of literature. In

**Table 5. Impact of different levels of soil applied K<sub>2</sub>O on seed cotton yield of cotton cultivars grown under K deficient soil.**

| Parameters              | Seed Cotton Yield (kg ha <sup>-1</sup> ) |          |          |          |          |          |          |          |
|-------------------------|------------------------------------------|----------|----------|----------|----------|----------|----------|----------|
|                         | 2016                                     |          |          |          | 2017     |          |          |          |
|                         | Cultivars                                | CYTO-301 | CYTO-142 | IUB-2013 | Mean (T) | CYTO-301 | CYTO-142 | IUB-2013 |
| 0 kg K <sub>2</sub> O   | 2653 de                                  | 2540 f   | 2208 i   | 2467 D   | 2695 de  | 2531 f   | 2118 i   | 2448 d   |
| 40 kg K <sub>2</sub> O  | 2814 c                                   | 2611 ef  | 2349 h   | 2591 C   | 2746 c   | 2622 ef  | 2368 h   | 2579 c   |
| 80 kg K <sub>2</sub> O  | 2988 b                                   | 2674 e   | 2421 g   | 2694 B   | 2871 b   | 2634 e   | 2435 g   | 2647 b   |
| 120 kg K <sub>2</sub> O | 3175 a                                   | 2713 d   | 2537 fg  | 2808 A   | 3060 a   | 2704 d   | 2524 fg  | 2763 a   |

C = Cultivars, T = Treatments, NS = Non-significant, Different alphabets with in the same column or row indicate statistically significant differences.

<https://doi.org/10.1371/journal.pone.0250713.t005>

Table 6. Impact of different levels of soil applied K<sub>2</sub>O on staple length and fiber elongation percentage of cotton cultivars grown under K deficient soil.

| Parameters              | Staple Length |          |          |          |          |          |          |          | Fiber Elongation Percentage (%) |          |          |          |          |          |          |          |
|-------------------------|---------------|----------|----------|----------|----------|----------|----------|----------|---------------------------------|----------|----------|----------|----------|----------|----------|----------|
|                         | 2016          |          |          |          | 2017     |          |          |          | 2016                            |          |          |          | 2017     |          |          |          |
|                         | Cultivars     | CYTO-301 | CYTO-142 | IUB-2013 | Mean (T) | CYTO-301 | CYTO-142 | IUB-2013 | Mean (T)                        | CYTO-301 | CYTO-142 | IUB-2013 | Mean (T) | CYTO-301 | CYTO-142 | IUB-2013 |
| 0 kg K <sub>2</sub> O   | 28            | 26       | 24       | 26 D     | 28       | 27       | 26       | 27.0 D   | 5.7                             | 5.3      | 4.8      | 5.3 D    | 5.5      | 5.3      | 4.8      | 5.2 D    |
| 40 kg K <sub>2</sub> O  | 29            | 28       | 24       | 27 C     | 29       | 28       | 27       | 28.0 C   | 5.9                             | 5.5      | 5.0      | 5.5 C    | 5.7      | 5.5      | 5.0      | 5.4 C    |
| 80 kg K <sub>2</sub> O  | 30            | 28       | 26       | 28 B     | 29       | 28       | 28       | 28.3 B   | 6.0                             | 5.7      | 5.2      | 5.6 B    | 5.8      | 5.6      | 5.3      | 5.6 B    |
| 120 kg K <sub>2</sub> O | 31            | 30       | 28       | 29.67 A  | 30       | 29       | 29       | 29.3 A   | 6.1                             | 5.8      | 5.5      | 5.8 A    | 5.9      | 5.7      | 5.4      | 5.7 A    |

C = Cultivars, T = Treatments, NS = Non-significant, Different alphabets with in the same column or row indicate statistically significant differences.

<https://doi.org/10.1371/journal.pone.0250713.t006>

present study, maximum improvement in plant height was observed by application of K at 120 kg ha<sup>-1</sup>. The findings of current experimentation are in line with the findings of Akhter *et al.* [22] and Ali *et al.* [23] who reported that cotton cultivars are more receptive to K fertilizer regarding plant height. As a matter of fact, K has a main role in photosynthesis, water storage control and stomata opening in leaves [24]. Significant role of K has been established in root elongation and development of an effective root system which further aids plants to uptake nutrients. So, ideal plant height can be attributed to the optimum dose of K [18]. Significantly higher dry matter (959 and 1005%) was calculated at higher dose of K in our study. These findings are comparable to the findings of Hasanuzzaman *et al.* [24] who have reported positive correlation of K fertilizer with plant dry matter. It happened due to the fact that K has significant effect on total dry matter of cotton plants. Where, K deficiency can reduce partitioning to roots and inhibited leaf photosynthetic rates [25].

Significantly higher fruiting points (453 and 461) were observed at highest dose of K in cv. Cyto-301. Additionally, the boll weight (4.8 and 5.2g) was also enhanced at higher K level. These findings are comparable to the study of Read *et al.* [26] and Tariq *et al.* (2018) [9] who have reported that cotton yield was significantly enhanced by the K application. The enhanced number of fruiting points and boll weight can be attributed to higher K requirement during boll setting where bolls act as major sink. Contrarily, boll shedding was reduced [8, 9, 27, 28]. Also, the use of K in cotton improves water use efficiency thus surplus water pressure within the boll increases the weight of the boll [29].

The Cyto-301 showed significantly lower shedding percentage (38.00 and 43.00%) at the highest dose of K (120 kg ha<sup>-1</sup>). Results were comparable to the findings of study conducted by Rasool *et al.* [30]. Interestingly, when due to heavy load set the demand for K is increased and

Table 7. Impact of different levels of soil applied K<sub>2</sub>O on fiber strength and fiber maturity ratio of cotton cultivars grown under K deficient soil.

| Parameters              | Fiber Strength |          |          |          |          |          |          |          | Fiber Maturity Ratio |          |          |          |          |          |          |          |
|-------------------------|----------------|----------|----------|----------|----------|----------|----------|----------|----------------------|----------|----------|----------|----------|----------|----------|----------|
|                         | 2016           |          |          |          | 2017     |          |          |          | 2016                 |          |          |          | 2017     |          |          |          |
|                         | Cultivars      | CYTO-301 | CYTO-142 | IUB-2013 | Mean (T) | CYTO-301 | CYTO-142 | IUB-2013 | Mean (T)             | CYTO-301 | CYTO-142 | IUB-2013 | Mean (T) | CYTO-301 | CYTO-142 | IUB-2013 |
| 0 kg K <sub>2</sub> O   | 94.6           | 90.2     | 89.5     | 91.5 D   | 90.4     | 89.5     | 88.4     | 89.4 D   | 1.15                 | 1.11     | 1.00     | 1.08 C   | 1.11     | 1.07     | 0.98     | 1.05 B   |
| 40 kg K <sub>2</sub> O  | 95.2           | 91.2     | 90.4     | 92.3 C   | 91.0     | 91.4     | 90.3     | 90.9 C   | 1.16                 | 1.12     | 1.04     | 1.11 B   | 1.12     | 1.08     | 1.00     | 1.06 B   |
| 80 kg K <sub>2</sub> O  | 95.7           | 93.2     | 91.0     | 93.3 B   | 93.5     | 92.6     | 91.5     | 92.5 A   | 1.16                 | 1.13     | 1.05     | 1.11 B   | 1.12     | 1.08     | 1.01     | 1.07 B   |
| 120 kg K <sub>2</sub> O | 96.2           | 94.5     | 92.2     | 94.3 A   | 94.3     | 93.1     | 92.4     | 93.3 A   | 1.17                 | 1.13     | 1.08     | 1.13 A   | 1.15     | 1.10     | 1.04     | 1.10 A   |

C = Cultivars, T = Treatments, NS = Non-significant, Different alphabets with in the same column or row indicate statistically significant differences.

<https://doi.org/10.1371/journal.pone.0250713.t007>

if the K is not supplied in enormous amount it results in the shedding of reproductive structures [31, 32].

Results accomplished that higher value for staple length (30 and 31) and fiber maturity parameters were attained in Cyto-301 at highest level of K. Findings regarding fiber elongation percentage were harmonized with the findings of Hallikeri *et al.* [33] and Ali *et al.* [15], who accomplished that increasing the quantity of inorganic fertilizer boosted the fiber elongation and fiber maturity traits. The K is involved protein production which enables the fiber to get more elongated [34]. The enhanced fiber maturity ratio indicated that diverse K use significantly exaggerated fiber maturity ratio because of varietal dissimilarities [35].

The improvement in cotton performance due to K application might be attributed to the increased photosynthetic rate owing to role of K in CO<sub>2</sub> fixation and cell turgor control [36]. The K application in cotton is also believed to extend N absorption, which causes vigorous vegetative growth [15] and ultimately increases yield. The use of K fertilizers in cotton enhanced metabolic activity and improved staple length, tensile strength, fiber micronaire, and decreased the amount of damaged fiber [37]. Several other studies have reported an improvement in seed-cotton yield and fiber quality due to K application in cotton [22, 34, 38, 39].

## Conclusion

Application of K at 120 kg ha<sup>-1</sup> produced maximum plant height, dry matter, fruiting point, bolls per plant, average boll weight and seed cotton yield with minimum shedding percentage. Fiber quality parameters including staple length, fiber strength and maturity ratio, and micronaire (fineness) were also significantly improved by application of K at 120 kg ha<sup>-1</sup>. Cultivar CYTO-301 was found more responsive to K fertilizer as compared to CYTO-142 and IUB-2013. Finding of present experimentation depicted that higher level of K fertilizer (120 kg ha<sup>-1</sup>) is considered appropriate to produce good quality of fiber with enhanced seed cotton yield. Future studies can work on doses higher than 120 Kg ha<sup>-1</sup> along with different ecological conditions to further inquire the role of K in cotton growth, development and yield.

## Acknowledgments

This manuscript is extracted from PhD thesis. I acknowledge the Central Cotton Research Institute, Multan-Pakistan for providing the resources including field and lab to conduct the research experiment. I also acknowledge the Fiber Technology Department, University of Agriculture Faisalabad-Pakistan.

## Author Contributions

**Conceptualization:** Hakoomat Ali.

**Data curation:** Shabir Hussain, Syed Tahir Raza Gardezi.

**Formal analysis:** Shabir Hussain.

**Methodology:** Shabir Hussain, Syed Tahir Raza Gardezi.

**Resources:** Hakoomat Ali.

**Supervision:** Hakoomat Ali.

**Writing – original draft:** Shabir Hussain, Syed Tahir Raza Gardezi.

**Writing – review & editing:** Hakoomat Ali, Syed Tahir Raza Gardezi.

## References

1. Constable GA, Bange MP. The yield potential of cotton (*Gossypium hirsutum* L.). *Field Crop Res.* 2015; 182: 98–106.
2. Ahmad N, Rashid M. Fertilizer and their use in Pakistan. NDFC Extension Bulletin, Islamabad. 2003.
3. Killi FL, Mustafayev S. Genetic and environmental variability in yield, yield components and lint quality traits of cotton. *Int J Agric Biol.* 2005; 7: 1007–1010.
4. Economic survey of Pakistan. Finance division. Economic advisory wing, Islamabad, Pakistan. [http://www.finance.gov.pk/survey/chapters\\_19/2-Agriculture.pdf](http://www.finance.gov.pk/survey/chapters_19/2-Agriculture.pdf). 2018.
5. USDA-United States Department of Agriculture. Cotton: World Markets and Trade. 2015. Accessed 14 Oct 2016. <https://www.fas.usda.gov/data/cotton-world-markets-andtrade>.
6. Ali MA, Khan IA. Why cotton is a problematic crop? Available at: <https://www.dawn.com/news/252184>. 2007a.
7. Shah MA, Farooq M, Hussain M. Productivity and profitability of wheat-cotton system as influenced by relay intercropping of insect resistant transgenic cotton in bed planted wheat. *Europ J Agron.* 2017; 75: 33–41.
8. Ayub M, Nadeem MA, Sharar MS, Mahmood N. Response of maize to different levels of nitrogen and phosphorus. *Asian J Plant Sci.* 2002; 1: 352–354.
9. Tariq M, Afzal MN, Muhammad D, Ahmad S, Shahzad AN, Kiran A, et al. Relationship of tissue K content with yield and fiber quality components of Bt cotton as influenced by K application methods. *Field Crop Res.* 2018; 229: 37–43.
10. Wakeel A, Rehman H, Magen H. Potash use for sustainable crop production in Pakistan: A review. *Int J Agri Biol.* 2017a; 19: 381–390.
11. Bradow JM, Davidonis GH. Quantification of fiber quality and cotton production-processing interface. *J Cotton Sci.* 2000; 4: 34–64.
12. Pettigrew WT (2008) K influences on yield and quality production for maize, wheat, soybean and cotton. *Physiol Plant* 133:670–681.
13. Zhang Z, Tian X, Duan L, Wang B, He Z, Li Z. Differential responses of conventional and Bt-transgenic cotton to K deficiency. *J Plant Nutr.* 2007; 30: 659–670.
14. Havlin JL, Beaton JD, Tisdale SL, Nelson WL. *Soil Fertility and Fertilizers. An introduction to management.* 7th Ed. Pearson Education Inc. Singapore. 2003; pp: 196–216
15. Ali MA, Tatla YH, Aslam M. Response of cotton (*Gossypium hirsutum* L.) to K fertilization in arid environment. *J Agri Res.* 2007b; 45: 191–196.
16. Mesbah EAE. Effects of irrigation regimes and foliar spraying of K on yield, yield components and water use efficiency of wheat in sandy soils. *World J Agri Sci.* 2009; 5: 662–669.
17. Golestanifard A, Santner J, Aryan A, Kaul HP, Wenzel WW. K fixation in northern Iranian paddy soils. *Geoderma.* 2020; 375: 114475.
18. Fontana JE, Wang G, Sun R, Xue H, Li Q, Liu J, et al. Impact of K deficiency on cotton growth, development and potential microRNA-mediated mechanism. *Plant Physiol Biochem.* 2020; 153: 72–80. <https://doi.org/10.1016/j.plaphy.2020.05.006> PMID: 32480238
19. Ullah A, Ali M, Shahzad K, Ahmad F, Iqbal S, Habib M, et al. Impact of Seed Dressing and Soil Application of Potassium Humate on Cotton Plants Productivity and Fiber Quality. *Plants* 2020; 9: 1444 <https://doi.org/10.3390/plants9111444> PMID: 33114781
20. Krifa M. Fiber Length Distribution in Cotton Processing: Dominant Features and Interaction Effects. *Textile Res J.* 2016; 76(5): 426–435.
21. Steel RGD, Torrie JH, Dickey DA. *Principles and procedure of statistics. A biometrical approach* 3rd Ed McGraw Hill Book Co. Inc., New York, 1997; pp. 352–358.
22. Akhtar ME, Sardar A, Ashraf M, Akhtar M, Khan MZ. Effect of potash application on seed cotton yield and yield components of selected cotton Varieties-I. *Asian J Plant Sci.* 2003; 2:602–604.
23. Ali H, Afzal MN, Ahmad S, Muhammad D. Effect of cultivars and sowing dates on yield and quality of *Gossypium hirsutum* L. *Crop. J Food Agric Environ.* 2009; 7: 244–247
24. Hasanuzzaman M, Bhuyan HM, Nahar K, Hossain SM, Mahmud AJ, Hossen SM, et al. Potassium: A Vital Regulator of Plant Responses and Tolerance to Abiotic Stresses. *Agronomy* 2018; 8(3): 1–29.
25. Gerardeaux E, Jordan-Meille L, Constantin J, Pellerin S, Dingkuhn M. Changes in plant morphology and dry matter partitioning caused by K deficiency in *Gossypium hirsutum* (L.). *Environ Exp Botany.* 2010; 67: 451–459.



26. Read JJ, Reddy KR, Jenkins JN. Yield and fiber quality of upland cotton as influenced by nitrogen and K nutrition. *European J. Agron.* 2006; 24:282–290.
27. Awan H, Awan I, Mansoor M, Khan EA, Khan MA. Effect of sowing time and plant spacing on fiber quality and seed cotton yield. *Sarhad J Agric.* 2011; 27: 411–413.
28. Bange MP, Caton SJ, Milroy SP. Managing yields of high fruit retention in transgenic cotton (*Gossypium hirsutum* L.) using sowing date. *Australian J. Agric Res.* 2008; 59: 733–741.
29. Stewart WM. Nutrition affects cotton yield and quality. Potash & Phosphate Institute Engineering Drive, Suite 110 Norcross, Georgia, 2005; 30092–2837
30. Rasool S, Hameed A, Azooz MM, Muneeb-u-Rehman, Siddiqi TO, Parvaiz Ahmad P. Salt stress: causes, types and responses of plants. In: Ahmad P, Azooz MM, Prasad MNV(eds) *Ecophysiology and responses of plants under salt stress*. Springer, New York, 2013; pp 1–24. [https://doi.org/10.1007/978-1-4614-4747-4\\_1](https://doi.org/10.1007/978-1-4614-4747-4_1)
31. Kumbhar AM, Buriro UA, Junejo S, Oad FC, Jamro GH, Kumbhar BA, et al. Impact of Different Nitrogen Levels on Cotton Growth, Yield and N-Uptake Planted in Legume Rotation. *Pak J Bot.* 2008; 40: 767–778.
32. Gudade BA, Thakur MR, Ulemale RB, Imade SR, Bodhade MS. Nutrient uptake, soil nutrient status and quality of new sunflower varieties as influenced by fertilizer levels. *J Soil Crop.* 2009; 19(2): 355–369.
33. Hallikeri SS, Halemani HL, Patil VC, Palled YB, Patil BC, Katageri IS. Effect of Nitrogen Levels, Split Application of K and Detopping on Seed Cotton Yield and Fibre Quality in Bt-Cotton. *Karnataka J Agric Sci.* 2010; 23: 418–422
34. Pervez H, Ashraf M, Makhdam MI. Influence of K rates and sources on seed cotton yield and yield components of some elite cotton cultivars. *J Plant Nutrition.* 2004; 27: 1295–1317.
35. Alagudurai S, Premsekhar M, Pushpanathan KR, Kumar D. Influence of nitrogen levels and its time of applications on yield and quality parameters of hybrid cotton. *Madras Aric J.* 2006; 93: 119–121.
36. Marschner H. *Mineral Nutrition of Higher Plants*. 2nd edition. Academic Press, London, UK. 1995; pp: 889.
37. Li W, Dong H, Tang W, Zhang D. Research progress in physiological premature senescence in cotton. *Cotton Sci.* 2005; 17: 56–60.
38. Aneela S, Muhammad A, Akhtar ME. Effect of potash on boll characteristics and seed cotton yield in newly developed highly resistant cotton varieties. *Pak J Biol Sci.* 2003; 6: 813–815.
39. Pettigrew WT, Meredith WR, Young LD. K fertilization effects on cotton lint yield, yield components and reniform nematode population. *Agron J.* 2005; 97: 1245–1251.
